# Supplementary material
Source: publisher figshare collection journal article supplement (https://karger.figshare.com/ndownloader/files/14606033)
Supplement: Supplementary file 1 [file 14606033]

**Supplementary Table 1.** Characteristics of neuron profiles in the caudal pole of the thalamic reticular nucleus.

| PARAMETER | ANTIBODY | |
| --- | --- | --- |
| Area (µm2) | PV | GAD |
| Number | 50 | 3 |
| Mean | 172.98 | 138.80 |
| Standard deviation | 66.07 | 88.8 |
| Range | 87.54-365.49 | 74.9-240.2 |
| Perimeter (µm) |  |  |
| Number | 50 | 3 |
| Mean | 52.67 | 45.19 |
| Standard deviation | 9.92 | 12.97 |
| Range | 35.81-74.67 | 33.75-59.28 |
| Length (µm) |  |  |
| Number | 50 | 3 |
| Mean | 18.94 | 16.32 |
| Standard Deviation | 4.34 | 5.00 |
| Range | 12.46-31.70 | 11.65-21.6 |
| Width (µm) |  |  |
| Number | 50 | 3 |
| Mean | 11.71 | 10.71 |
| Standard deviation | 2.38 | 3.39 |
| Range | 8.03-18.13 | 7.92-14.48 |
| Eccentricity (Width/Length) |  |  |
| Number | 50 | 3 |
| Mean | 0.63 | 0.66 |
| Standard deviation | 0.12 | 0.04 |
| Range | 0.36-0.90 | 0.62-0.68 |
